# Supplementary material for: O and N co-doped porous carbon derived from crop waste for a high-stability all-solid-state symmetric supercapacitor
Source: Royal Society of Chemistry journal article supplement (doi:10.1039/d2nj04125a), 2022-01-01
Supplement: d2nj04125a1.pdf [file d2nj04125a1.pdf]

## **O and N co-doped porous carbon derived from crop wastes for high-stability all-solid-state symmetric supercapacitor**

Fengyu Wu<sup>a#</sup>, Xue Ren<sup>a#</sup>, Fenyang Tian<sup>a</sup>, Guanghui Han<sup>a</sup>, Jie Sheng<sup>b</sup>, Yongsheng Yu<sup>a\*</sup>,  
Yequn Liu<sup>c\*</sup> and Weiwei Yang<sup>a\*</sup>

<sup>a</sup>MIIT Key Laboratory of Critical Materials Technology for New Energy Conversion and Storage, School of Chemistry and Chemical Engineering, Harbin Institute of Technology, Harbin, 150001, China

<sup>b</sup>Laboratory for Space Environment and Physical Science, Research Center of Basic Space Science, Harbin Institute of Technology, Harbin 150001, China

<sup>c</sup>Analytical Instrumentation Center, State Key Laboratory of Coal Conversion, Institute of Coal Chemistry, Chinese Academy of Sciences, Taiyuan, Shanxi 030001, China

# These authors contributed equally.

\*Corresponding authors.

E-mail addresses: yangww@hit.edu.cn (W. Yang), liuyequn@sxicc.ac.cn (Y. Liu), ysyu@hit.edu.cn (Y. Yu).

## Materials

SP was obtained from the soybean straw purchased from Suihua City, Heilongjiang Province. Potassium hydroxide (KOH, 97%) was provided by Aladdin Reagent Co., LTD. Anhydrous ethanol ( $\text{CH}_3\text{CH}_2\text{OH}$ , AR) and Hydrochloric acid (HCl, 12 M) were supplied by Sinopharm Chemical Reagent Co. LTD. Polyvinyl alcohol (PVA-117) was provided by Aladdin Reagent Co., LTD. All reagents were used without further purification.

## Material characterization

The morphology of samples was recorded on field-emission scanning electron microscopy (FE-SEM, Supra 55, Zeiss). Transmission electron microscopy (TEM) and high-resolution transmission electron microscopy (HRTEM) images were obtained using JEM-1400 and JEM-2100. X-ray diffraction (XRD) patterns were tested on a PAN analytical X'Pert Powder with Cu  $K\alpha$  radiation ( $\lambda = 1.5418 \text{ \AA}$ ). The Raman spectra were evaluated using LabRAM HR Evolution with a 532 nm excitation laser. And the X-ray photoelectron spectroscopic (XPS) measurement was recorded on a Thermo ESCALAB 250Xi instrument.

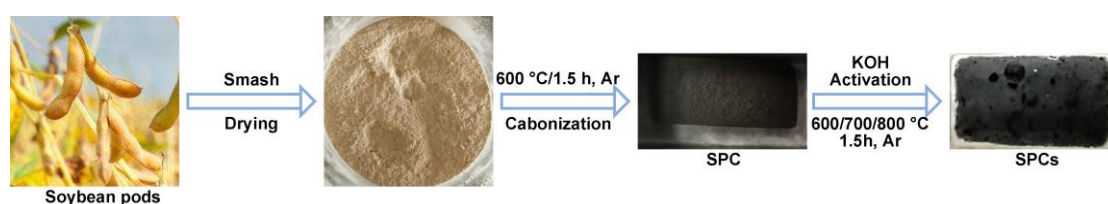

**Fig. S1** Preparation process of soybean pod-derived porous carbon.

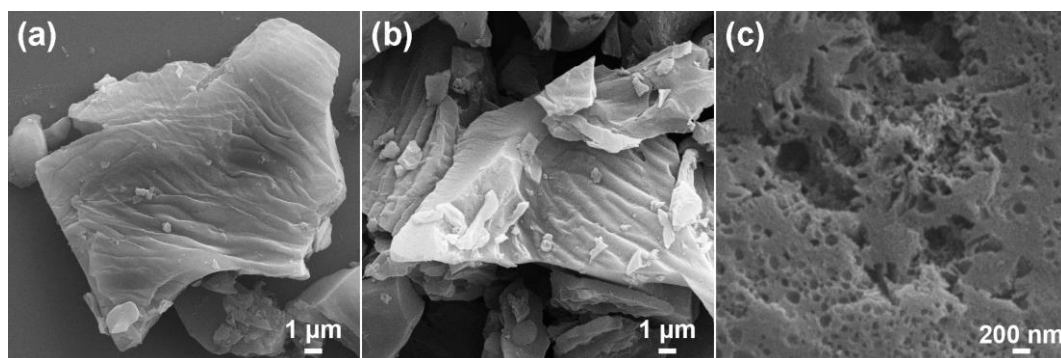

**Fig. S2** Morphology characterization of SPC and SPC/700 °C/3. SEM images of (a) SPC, (b, c)

SPC/700 °C/3

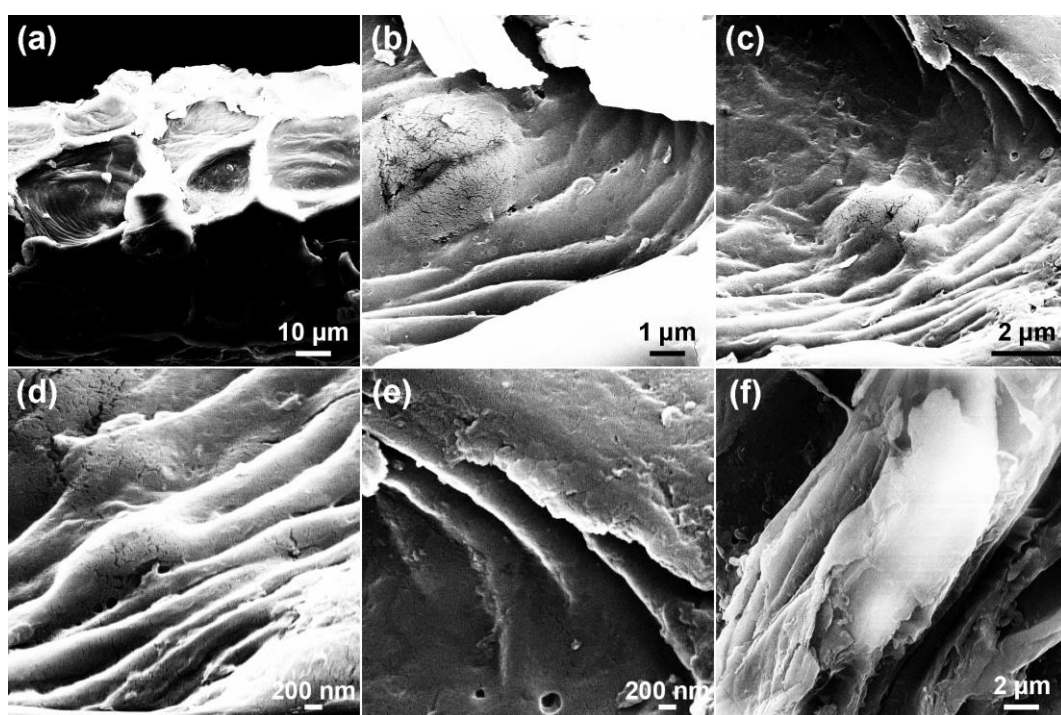

**Fig. S3** SEM images of SP.

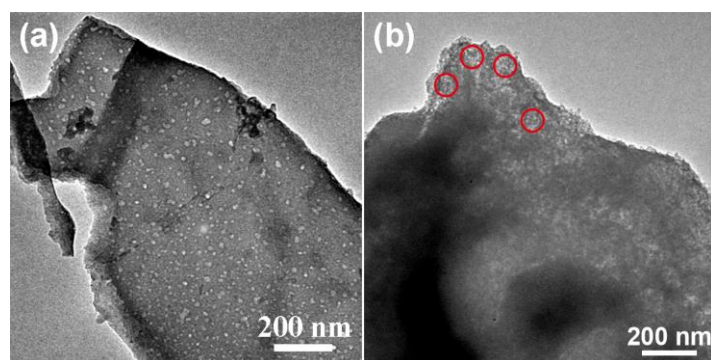

**Fig. S4** TEM images of (a) SPC/700 °C/1, (b) SPC/700 °C/5.

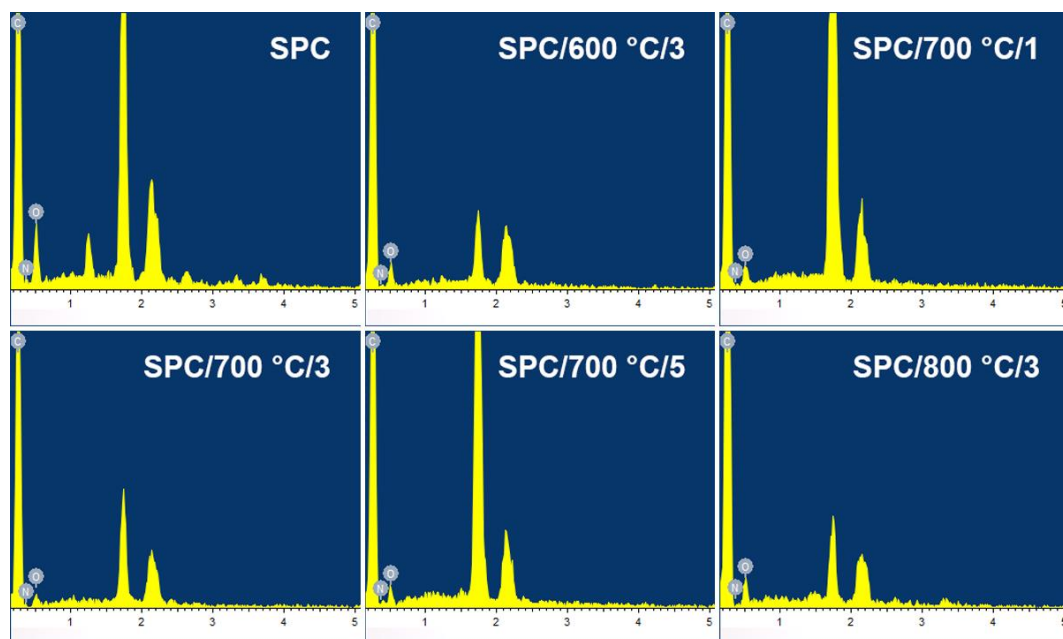

Fig. S5 EDS spectrum of SPCs.

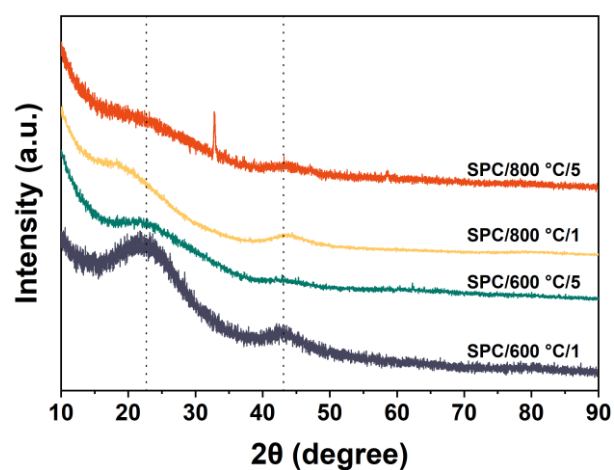

Fig. S6 XRD patterns of SPC/600°C/1, SPC/600°C/5, SPC/800°C/1 and SPC/800°C/5.

Table S1 Surface elemental compositions of SPC and SPC/700 °C/3

| Samples      | Surface Elemental Analysis, at% |      |      |            |
|--------------|---------------------------------|------|------|------------|
|              | C                               | O    | N    | Heteroatom |
| SPC          | 93.11                           | 5.91 | 0.98 | 6.89       |
| SPC/700 °C/3 | 89.23                           | 9.86 | 0.91 | 10.77      |

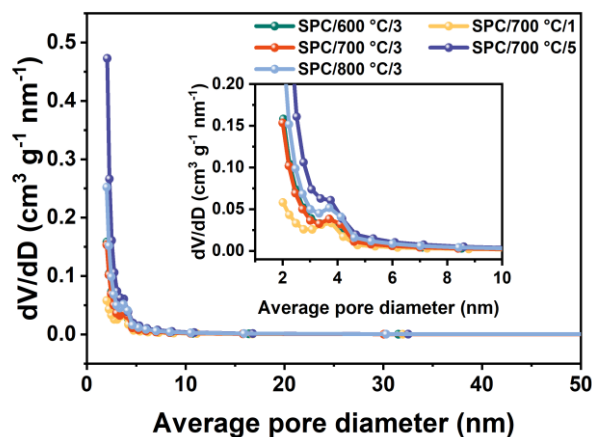

Fig. S7 Mesopore size distribution of SPCs.

Table S2 Pore structure characteristics of SPCS

| Samples      | $S_{\text{BET}}$ ( $\text{m}^2 \text{g}^{-1}$ ) | $V_{\text{total}}$ ( $\text{cm}^3 \text{g}^{-1}$ ) | $D_{\text{aver}}$ (nm) |
|--------------|-------------------------------------------------|----------------------------------------------------|------------------------|
| SPC          | 9.0721                                          | 0.0127                                             | 5.5996                 |
| SPC/600 °C/3 | 1805.21                                         | 1.0098                                             | 2.2375                 |
| SPC/700 °C/1 | 889.228                                         | 0.5326                                             | 2.3958                 |
| SPC/700 °C/3 | 1807.56                                         | 1.0347                                             | 2.2897                 |
| SPC/700 °C/5 | 2891.23                                         | 1.5607                                             | 2.1592                 |
| SPC/800 °C/3 | 2052.52                                         | 1.1934                                             | 2.3257                 |

The electrochemical performance of Ni foam was tested in the three-electrode system in the 6 M KOH aqueous electrolyte (Fig. S8). And the specific capacitance was calculated to only be  $1.05 \text{ F g}^{-1}$  at  $1 \text{ A g}^{-1}$ .

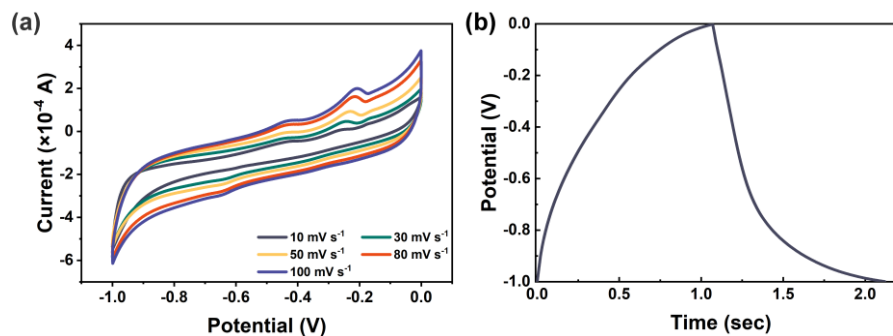

Fig. S8 Electrochemical performance of pure Ni foam measured in a three-electrode system in the 6 M KOH electrolyte. (a) CV curves at 10-100  $\text{mV s}^{-1}$ , (b) GCD curves at  $1 \text{ A g}^{-1}$ .

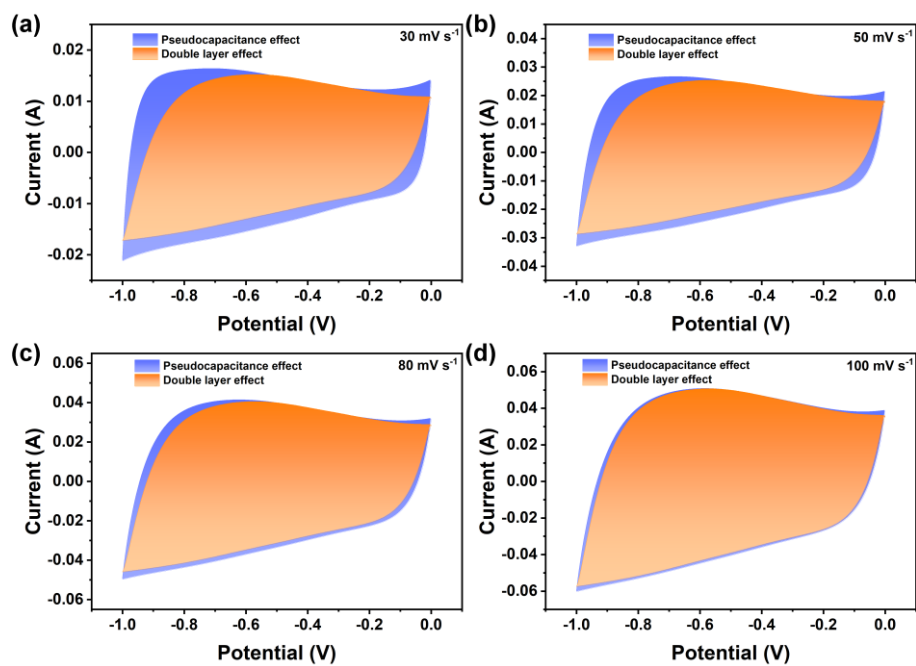

**Fig. S9** The schematic diagram of capacitance contribution of SPC/700 °C/3 (a)30 mV s<sup>-1</sup>, (b)50 mV s<sup>-1</sup>, (c)80 mV s<sup>-1</sup>, (d)100 mV s<sup>-1</sup>.

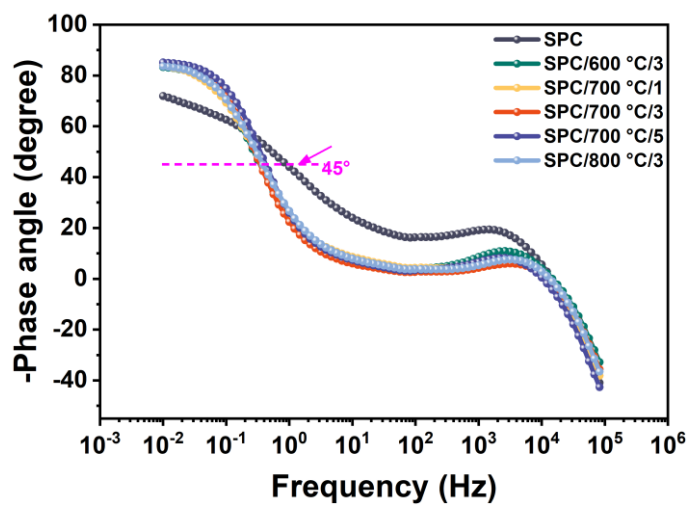

**Fig. S10** Bode phase angle plots of SPC and SPCs electrodes.

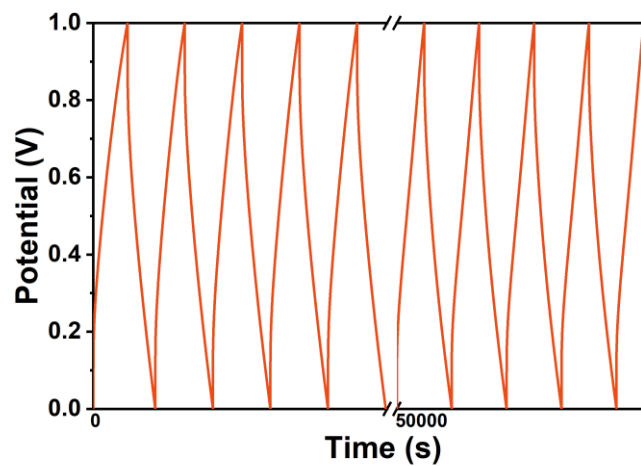

**Fig. S11** The GCD curves of the first 5 cycles and the last 5 cycles during the cycle.
